# Supplementary material
Source: PubMed Central journal article supplement (PMC7536625)
Supplement: jamasurg-e204350-s003.pdf [file jamasurg-e204350-s003.pdf]

# Data Sharing Statement

Guyette. Tranexamic Acid During Prehospital Transport in Patients at Risk for Hemorrhage After Injury. *JAMA Surg.* Published October 05, 2020. doi:10.1001/jamasurg.2020.4350

## Data

**Data available:** Yes

**Data types:** Deidentified participant data

**How to access data:** Following publication of the primary and all secondary analyses detailed in the protocol, individual de-identified data will be available upon request and approval of the proposed use of the data after 3 years of the close of the trial. The trial protocol, statistical analysis plan embedded in the protocol and the trial publications will be available on-line. Contact [sperryjl@upmc.edu](mailto:sperryjl@upmc.edu)

**When available:** beginning date: 02-01-2023, end date: 01-30-2025

## Supporting Documents

**Document types:** None

## Additional Information

**Who can access the data:** Following publication of the primary and all secondary analyses detailed in the protocol, individual de-identified data will be available upon request and approval of the proposed use of the data after 3 years of the close of the trial. The trial protocol, statistical analysis plan embedded in the protocol and the trial publications will be available on-line. Contact [sperryjl@upmc.edu](mailto:sperryjl@upmc.edu)

**Types of analyses:** Following publication of the primary and all secondary analyses detailed in the protocol, individual de-identified data will be available upon request and approval of the proposed use of the data after 3 years of the close of the trial.

**Mechanisms of data availability:** Following publication of the primary and all secondary analyses detailed in the protocol, individual de-identified data will be available upon request and approval of the proposed use of the data after 3 years of the close of the trial.
